# Supplementary material for: Hybrid photosensitizer based on amphiphilic block copolymer stabilized silver nanoparticles for highly efficient photodynamic inactivation of bacteria
Source: Royal Society of Chemistry journal article supplement (doi:10.1039/c6ra01660j), 2016-01-01
Supplement: c6ra01660j1.pdf [file c6ra01660j1.pdf]

## Hybrid Photosensitizer Based on Amphiphilic Block Copolymer Stabilized Silver Nanoparticles for Highly Efficient Photodynamic Inactivation of Bacteria

### Supplementary Information

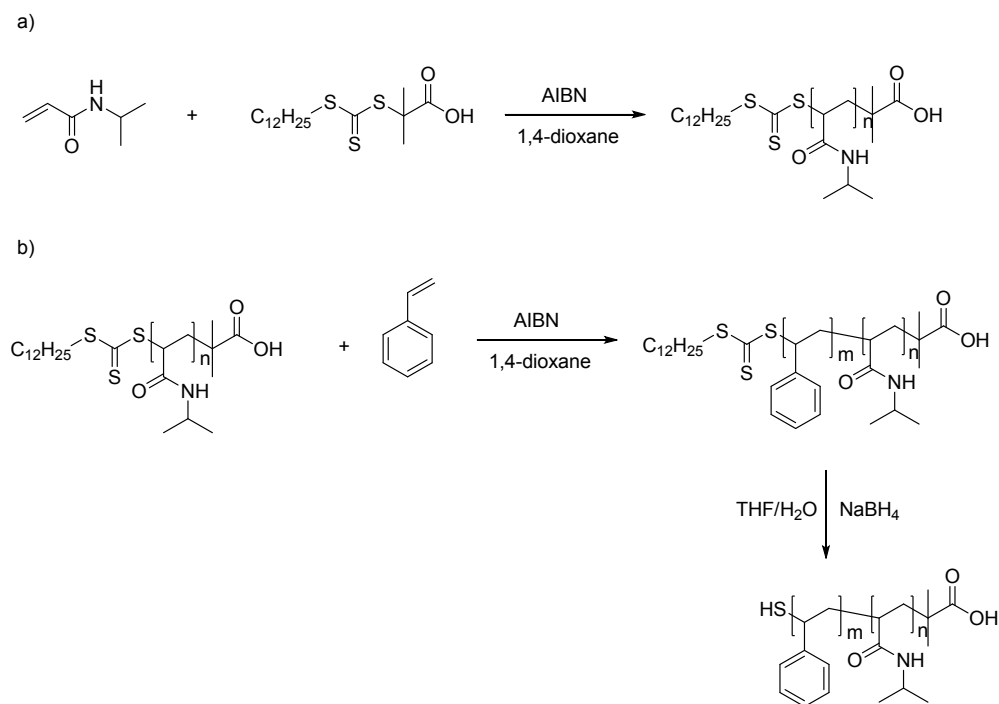

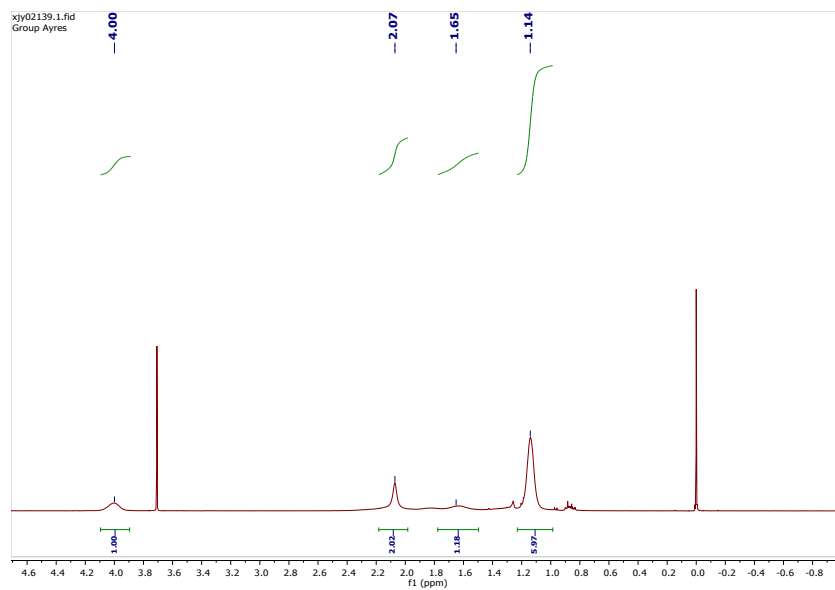

**Figure S1.**  $^1\text{H}$  NMR spectrum of poly(*N*-isopropylacrylamide)

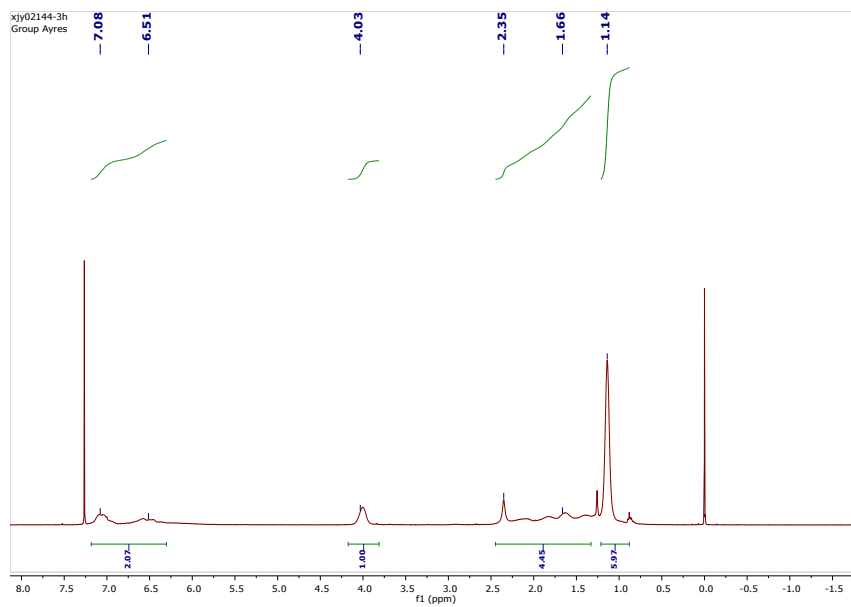

**Figure S2.**  $^1\text{H}$  NMR spectrum of poly(*N*-isopropylacrylamide-*b*-styrene).

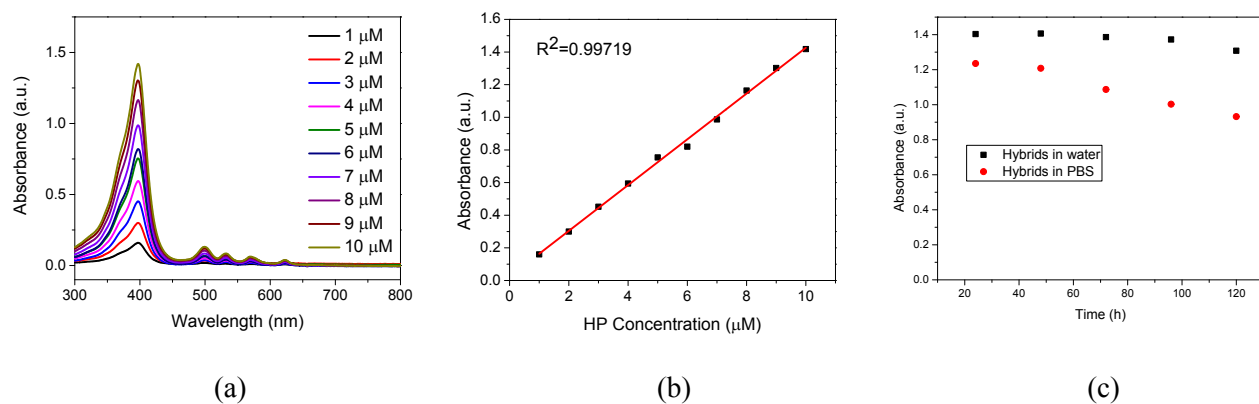

**Figure S3.** (a) UV-Vis absorption spectra of a series of HP solutions (1 – 10 μM); (b) Calibration curve of HP solutions; (c) HP leakage test for 5 days.

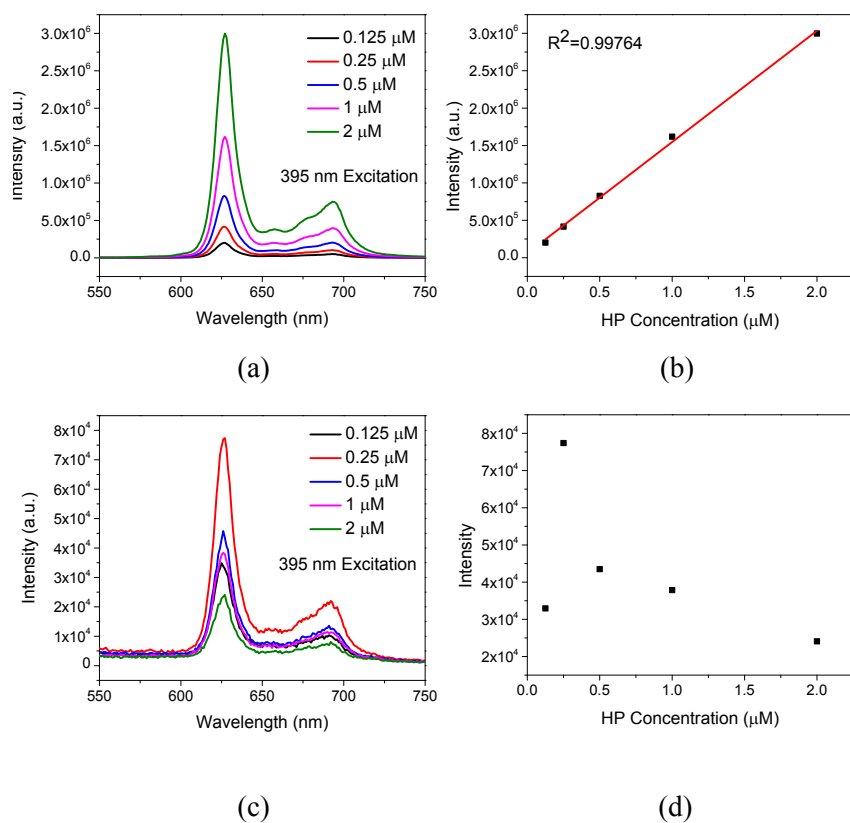

**Figure S4.** (a) Fluorescence emission spectra of pristine HP; (b) Fluorescence intensity (at 627 nm) vs. [HP]; (c) Fluorescence emission spectra of AgNP@PNIPAAm-styrene@HP; (d) Fluorescence intensity (at 627 nm) vs. [HP in hybrids].

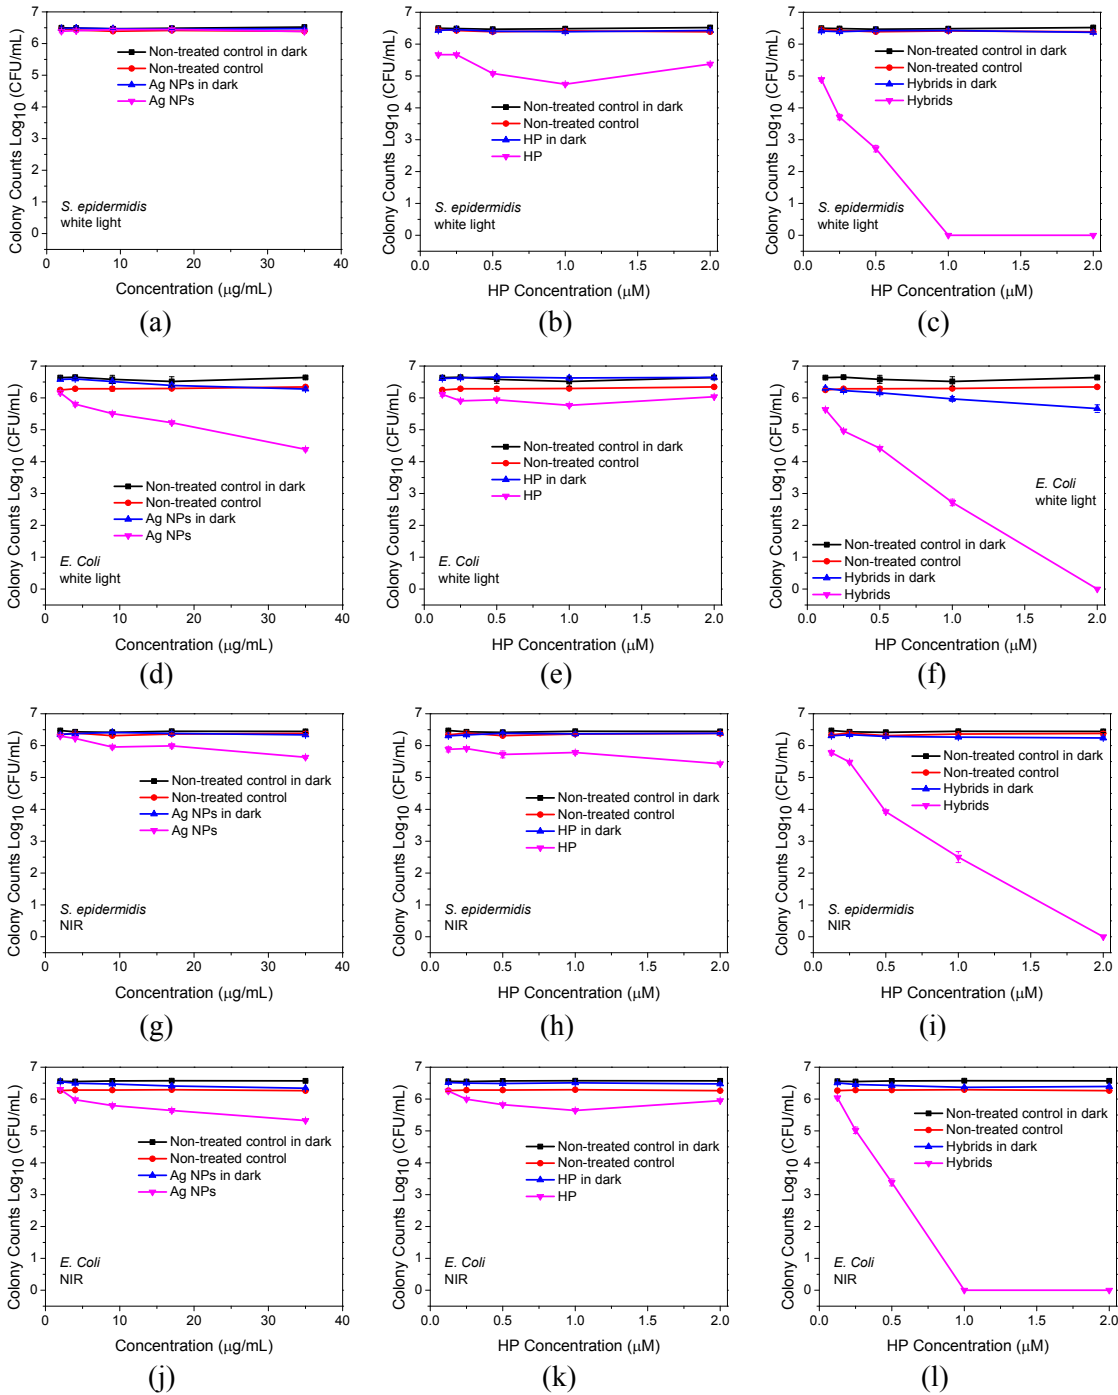

**Figure S5.** PDI efficacy of AgNP@BCP, pristine HP, and AgNP@BCP@HP against *S. epidermidis* (ATCC 35984) (a-c) and *E. coli* (ATCC 35218) (d-f) under white light illumination. PDI efficacy of AgNP@BCP, pristine HP, and AgNP@BCP@HP against *S. epidermidis* (ATCC 35984) (g-i) and *E. coli* (ATCC 35218) (j-l) under red/NIR illumination.

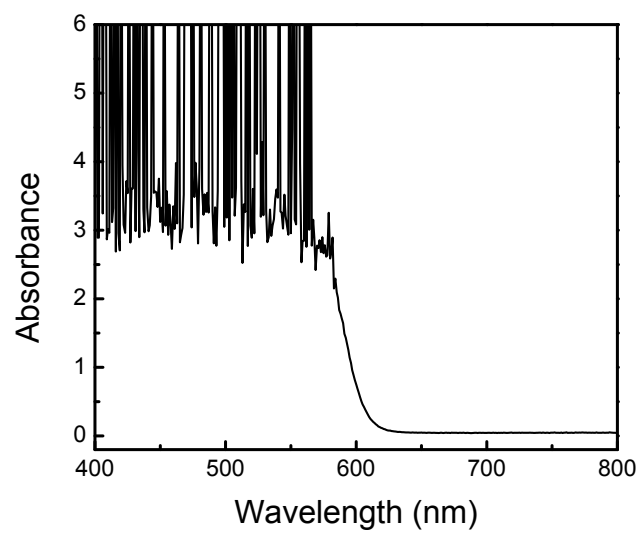

**Figure S6.** Absorption spectrum of the bandpass filter (Edmund Optics #84-903) used in the red/NIR illumination experiment.
